# Supplementary material
Source: publisher figshare collection journal article supplement (https://frontiersin.figshare.com/ndownloader/files/28586592)
Supplement: Supplementary file 1 [file 28586592]

**Supplemental Material for Gabriele, Ponirakis and Klinck 2021: *Underwater sound levels in Glacier Bay during reduced vessel traffic due to the COVID-19 pandemic* Frontiers in Marine Science 2021**

**Supplementary Table 1.** Distribution of broadband sound levels (17.8-8,910 Hz dB re 1  $\mu$ Pa) at 10-minute resolution in Glacier Bay during the Visitor Season (May-September), Off-Season (October-April), Operating Hours (06:00-20:00 (UST-8)). The color shading denotes relative sound levels.

| Time Period                                   | Percentiles |             |             |             |              |              |              |
|-----------------------------------------------|-------------|-------------|-------------|-------------|--------------|--------------|--------------|
|                                               | 1%          | 10%         | 25%         | 50%         | 75%          | 95%          | 99%          |
| 2016 - Visitor Season & Open Hours            | 82.6        | 87.6        | 92.9        | 98.8        | 104.7        | 113.2        | 118.9        |
| 2018 - Visitor Season & Open Hours            | 82.8        | 88.8        | 93.1        | 99.0        | 104.7        | 113.8        | 119.0        |
| <b>2020 - Visitor Season &amp; Open Hours</b> | <b>81.9</b> | <b>86.1</b> | <b>90.8</b> | <b>96.3</b> | <b>100.5</b> | <b>109.1</b> | <b>114.9</b> |
| 2016 - Visitor Season & Off Hours             | 80.8        | 84.6        | 88.8        | 94.9        | 99.4         | 107.1        | 113.7        |
| 2018 - Visitor Season & Off Hours             | 79.6        | 87.2        | 92.4        | 97.2        | 100.5        | 108.0        | 114.0        |
| <b>2020 - Visitor Season &amp; Off Hours</b>  | <b>81.5</b> | <b>85.5</b> | <b>90.2</b> | <b>96.1</b> | <b>100.5</b> | <b>105.1</b> | <b>111.8</b> |
| 2016 - Off-Season & Open Hours                | 79.8        | 84.3        | 87.6        | 92.3        | 96.6         | 104.1        | 113.1        |
| 2018 - Off-Season & Open Hours                | 81.1        | 85.8        | 90.0        | 94.8        | 99.2         | 107.3        | 113.4        |
| <b>2020 - Off-Season &amp; Open Hours</b>     | <b>80.5</b> | <b>84.5</b> | <b>88.5</b> | <b>93.7</b> | <b>98.4</b>  | <b>105.0</b> | <b>112.6</b> |
| 2016 - Off-Season & Off Hours                 | 78.7        | 82.5        | 86.3        | 91.3        | 96.5         | 105.3        | 113.9        |
| 2018 - Off-Season & Off Hours                 | 80.5        | 85.6        | 90.4        | 95.5        | 100.4        | 108.8        | 113.6        |
| <b>2020 - Off-Season &amp; Off Hours</b>      | <b>79.6</b> | <b>83.2</b> | <b>87.3</b> | <b>93.0</b> | <b>98.5</b>  | <b>105.9</b> | <b>112.0</b> |

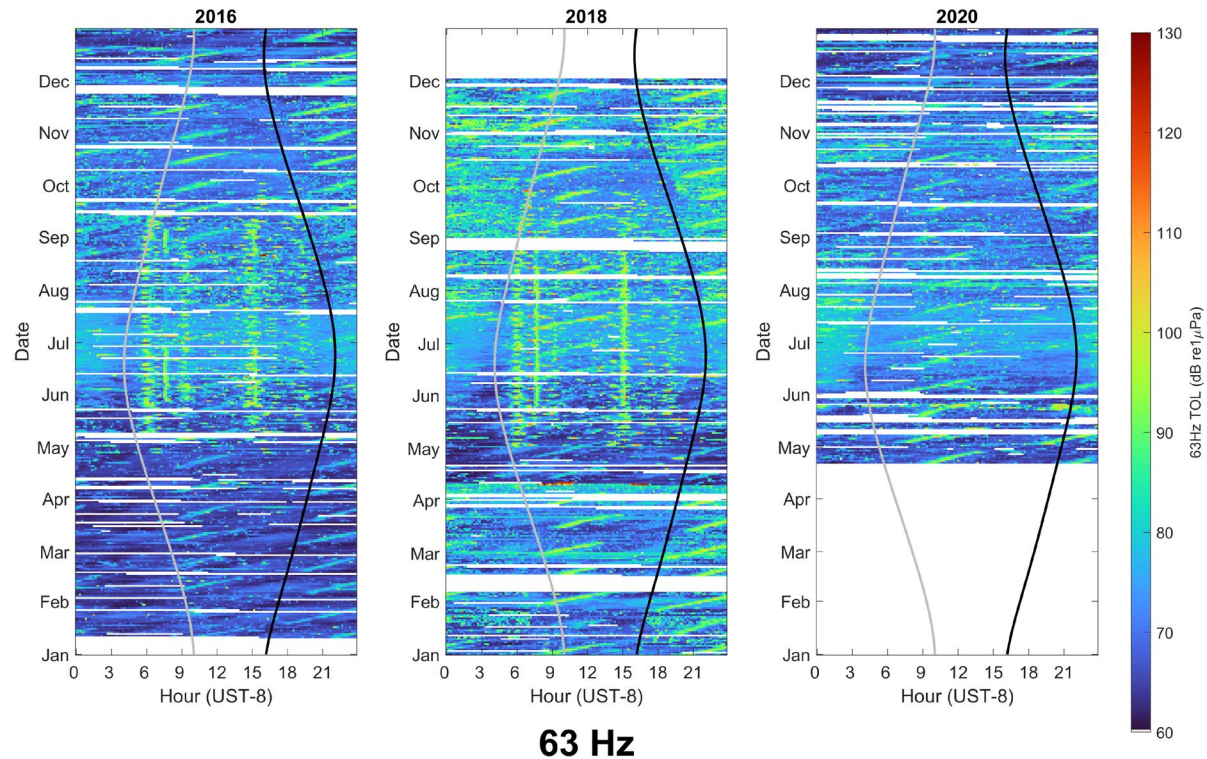

**Supplemental Figure 1.** Spectral density for the 63.1 Hz one-third octave band in lower Glacier Bay. The 63 Hz band is considered a standard metric for documenting the effect of shipping traffic on the underwater sound environment. The light gray line indicates sunrise time and the black line indicates sunset time. Spectral density plots for all one-third octave bands (8.91-8910 Hz) in 2016, 2018 and 2020 are compiled in [Video 1](#).

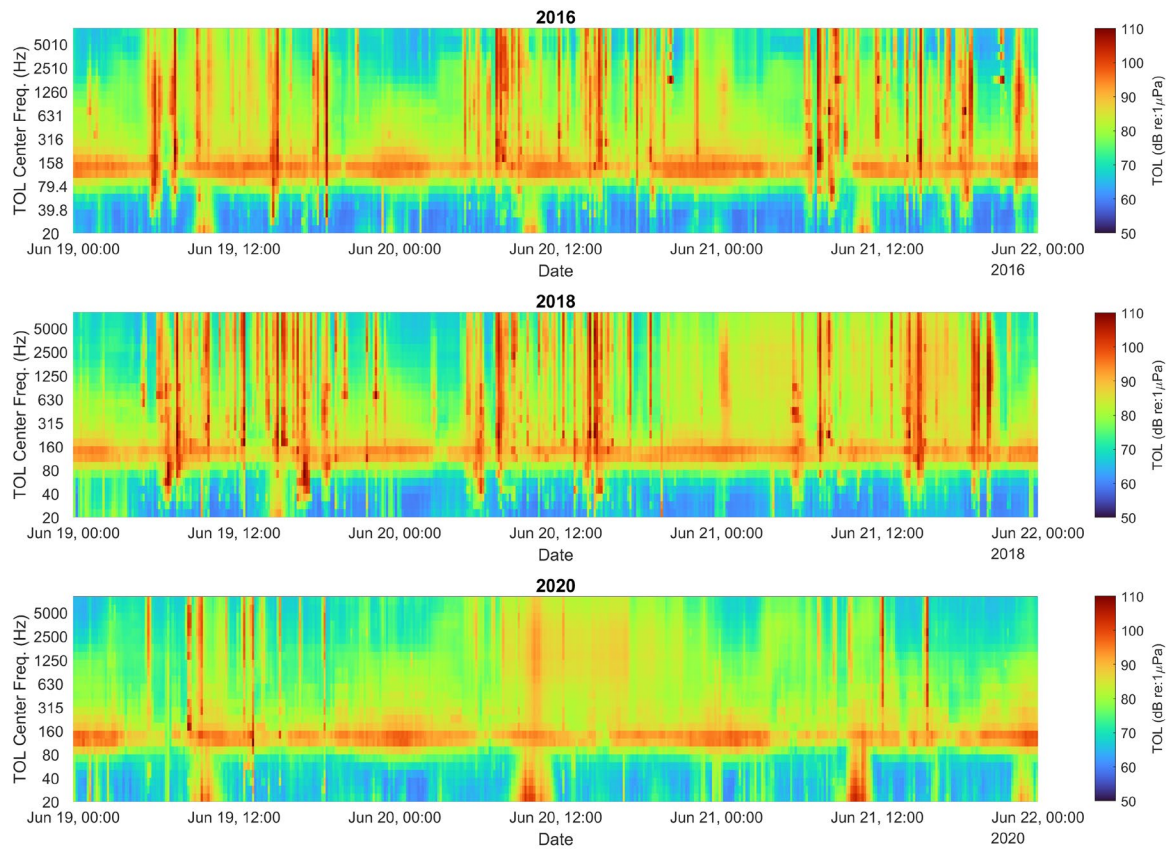

**Supplemental Figure 2.** One-third octave (TOL) long term spectral average plot for June 19-22 in 2016, 2018 and 2020. At this scale, individual noise events are visible including numerous vessel passages. The sound energy from harbour seal vocalizations is visible as the nearly continuous horizontal signal between 79.4 and 158 Hz. The periodic red energy at low frequencies (<39.8 Hz) is caused by tidal flow over the hydrophone sensor.

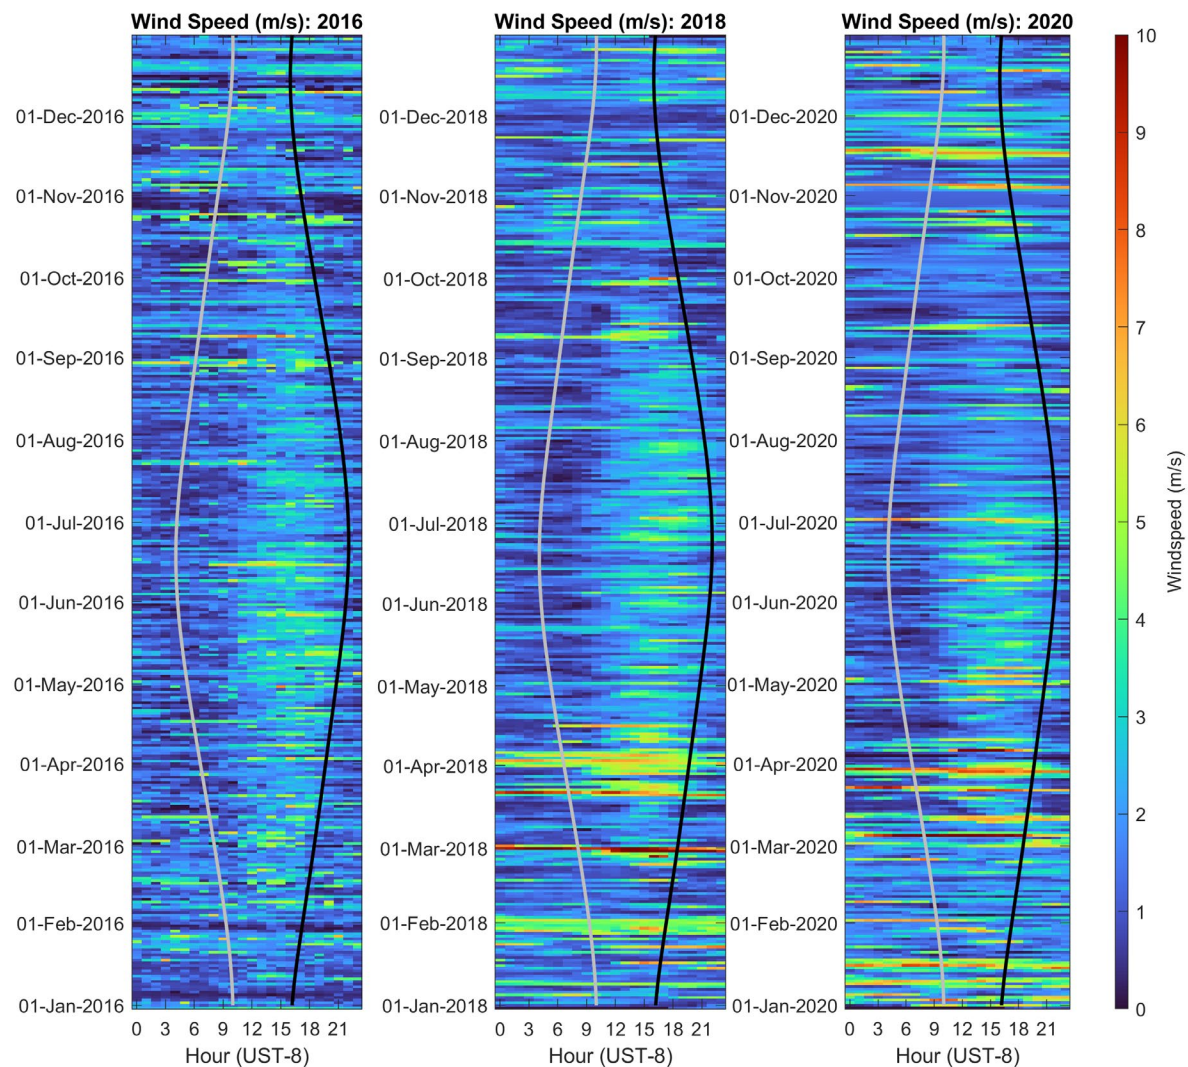

**Supplemental Figure 3.** Hourly wind speed data in Glacier Bay for 2016, 2018 and 2020 with wind speed indicated according to the color scale at right. Wind creates surface disturbances that result in wave, turbulence, droplet and bubble activity that create ‘wind noise’, long recognized as a primary source of underwater noise. Intense wind events (storms) are shown in yellow and red. The predominant summer wind pattern of increasing afternoon westerly or south-westerly winds is also evident. The light gray line indicates sunrise time and the black line indicates sunset time.

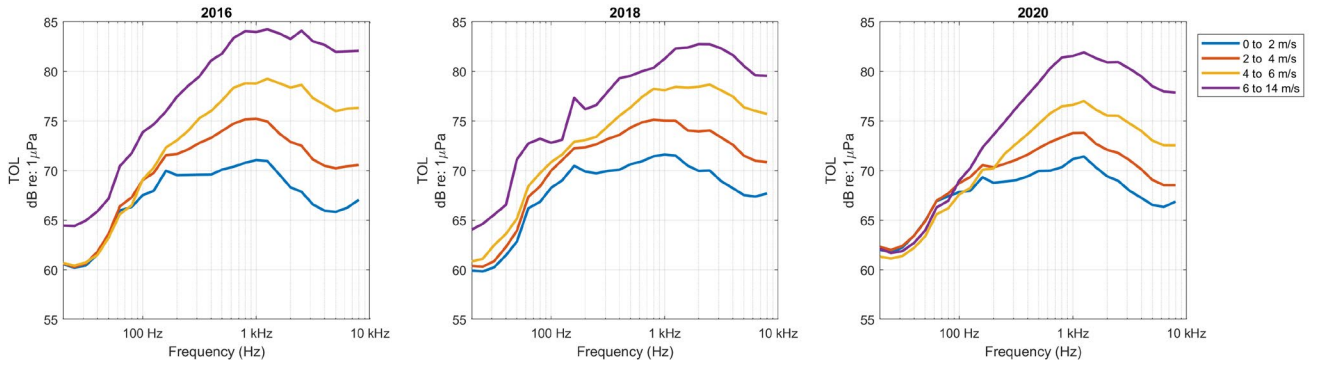

**Supplemental Figure 4.** 10th Percentile Distribution of Leq, 10-minute one-third-octave band sound levels (TOL) by year as a function of wind speed for the May-September Operating Season.

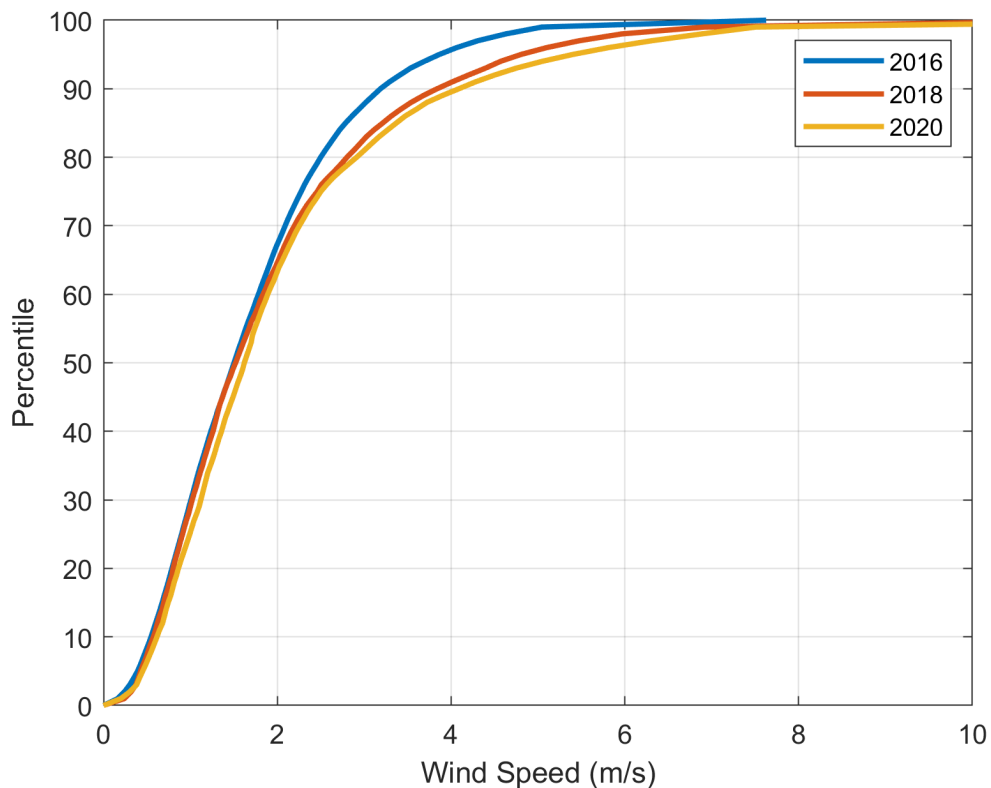

**Supplemental Figure 5.** Cumulative distribution of wind speeds in lower Glacier Bay in May-September 2016, 2018 and 2020. Wind speeds are based on data from DarkSky API in 2016 and from the NOAA National Data Buoy Center station BLTA2 in Bartlett Cove in 2018 and 2020.

**Gabriele, Ponirakis and Klinck 2021: Underwater sound levels in Glacier Bay during reduced vessel traffic due to the COVID-19 pandemic** *Frontiers in Marine Science* 2021

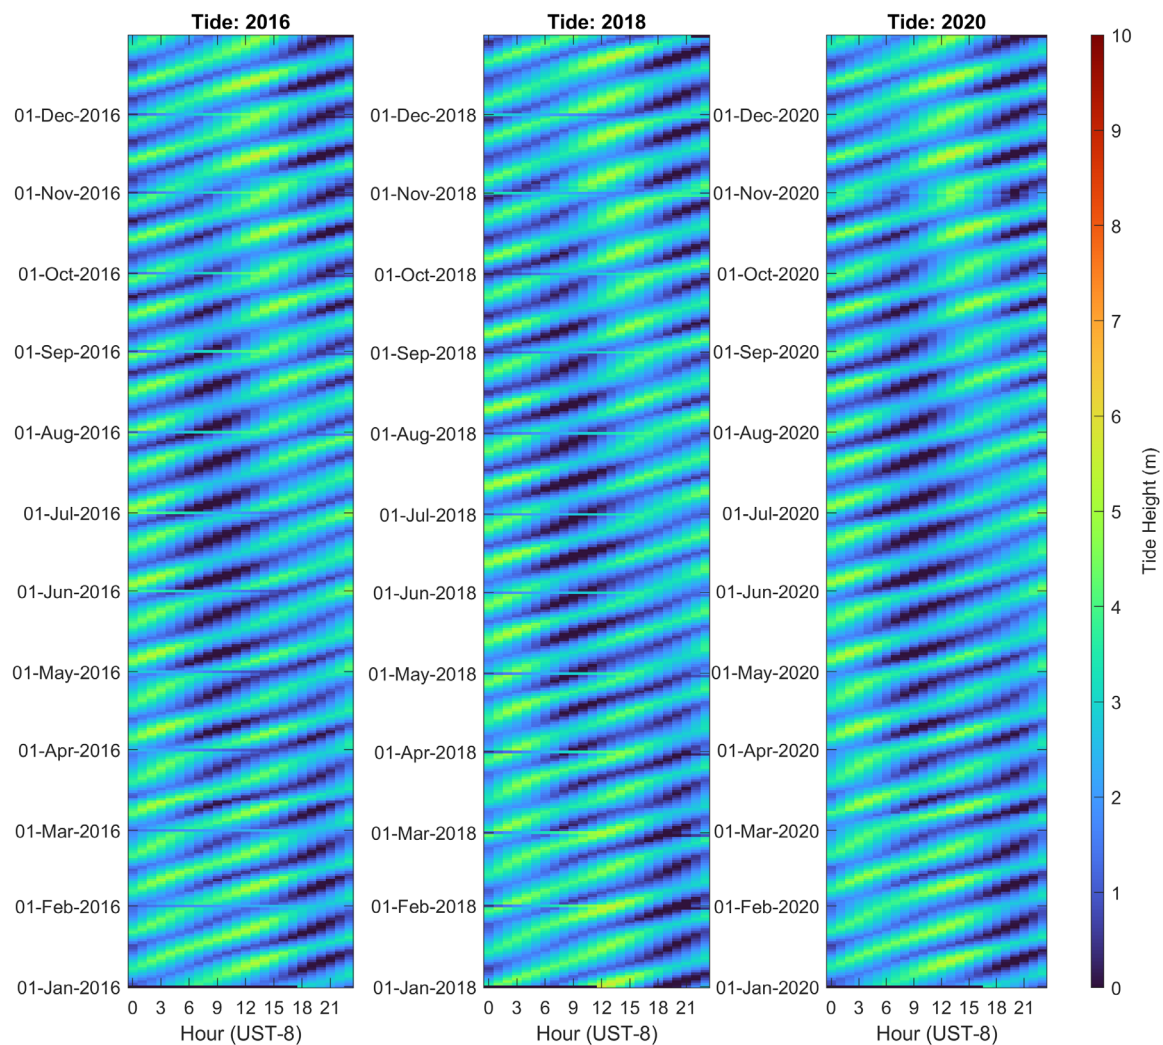

**Supplemental Figure 6.** Hourly magnitude of tidal flow in lower Glacier Bay in 2016, 2018 and 2020, based on data from DarkSky API. Tidal flow over the hydrophone sensor is an artifact that does not create sound but recognizing its pattern and impact on noise measurements is important.

## Supplemental Figure 7. Cruise ship schedule for 2016

|                                                                                      |                                                                                              |                                                                                         |                                                                                                   |                                                                                                  |                                                                                         |                                                                                                  |
|--------------------------------------------------------------------------------------|----------------------------------------------------------------------------------------------|-----------------------------------------------------------------------------------------|---------------------------------------------------------------------------------------------------|--------------------------------------------------------------------------------------------------|-----------------------------------------------------------------------------------------|--------------------------------------------------------------------------------------------------|
| Sunday, April 24                                                                     | Monday, April 25                                                                             | Tuesday, April 26                                                                       | Wednesday, April 27                                                                               | Thursday, April 28<br>GB CRYSTAL SERENITY<br>07:00 - 15:00                                       | Friday, April 29                                                                        | Saturday, April 30<br>GB VOLENDAM<br>07:00 - 16:00                                               |
| Sunday, May 1                                                                        | Monday, May 2                                                                                | Tuesday, May 3                                                                          | Wednesday, May 4<br>GB NIEUW AMSTERDAM<br>07:00 - 16:00                                           | Thursday, May 5<br>GB NOORDAM<br>07:00 - 16:00                                                   | Friday, May 6                                                                           | Saturday, May 7                                                                                  |
| Sunday, May 8<br>GB VOLENDAM<br>07:00 - 16:00<br>GB CROWN PRINCESS<br>11:00 - 19:30  | Monday, May 9                                                                                | Tuesday, May 10<br>GB NORWEGIAN PEARL<br>06:00 - 15:00<br>GB WESTERDAM<br>07:00 - 16:00 | Wednesday, May 11<br>GB NIEUW AMSTERDAM<br>07:00 - 16:00                                          | Thursday, May 12<br>GB NOORDAM<br>07:00 - 16:00                                                  | Friday, May 13                                                                          | Saturday, May 14                                                                                 |
| Sunday, May 15<br>GB VOLENDAM<br>07:00 - 16:00<br>GB CROWN PRINCESS<br>11:00 - 19:30 | Monday, May 16<br>GB GRAND PRINCESS<br>06:00 - 15:00<br>GB ISLAND PRINCESS<br>06:00 - 15:00  | Tuesday, May 17<br>GB STAR PRINCESS<br>06:00 - 15:00<br>GB WESTERDAM<br>07:00 - 16:00   | Wednesday, May 18<br>GB NIEUW AMSTERDAM<br>07:00 - 16:00                                          | Thursday, May 19<br>GB NORWEGIAN PEARL<br>06:00 - 15:00<br>GB CORAL PRINCESS<br>06:15 - 15:15    | Friday, May 20<br>GB NOORDAM<br>07:00 - 16:00<br>GB ISLAND PRINCESS<br>09:15 - 19:30    | Saturday, May 21<br>GB CARNIVAL LEGEND<br>06:00 - 15:00                                          |
| Sunday, May 22<br>GB VOLENDAM<br>07:00 - 16:00                                       | Monday, May 23<br>GB CORAL PRINCESS<br>09:15 - 19:30                                         | Tuesday, May 24<br>GB WESTERDAM<br>07:00 - 16:00<br>GB NOORDAM<br>10:00 - 19:00         | Wednesday, May 25<br>GB CROWN PRINCESS<br>06:00 - 15:00<br>GB NIEUW AMSTERDAM<br>07:00 - 16:00    | Thursday, May 26<br>GB NORWEGIAN PEARL<br>06:00 - 15:00<br>GB STAR PRINCESS<br>06:15 - 15:15     | Friday, May 27<br>GB NORWEGIAN SUN<br>06:00 - 15:00<br>GB ZAANDAM<br>07:00 - 16:00      | Saturday, May 28<br>GB CARNIVAL LEGEND<br>06:00 - 15:00                                          |
| Sunday, May 29<br>GB VOLENDAM<br>07:00 - 16:00                                       | Monday, May 30<br>GB ISLAND PRINCESS<br>06:00 - 15:00<br>GB STAR PRINCESS<br>09:15 - 19:30   | Tuesday, May 31<br>GB WESTERDAM<br>07:00 - 16:00<br>GB ZAANDAM<br>10:00 - 19:00         | Wednesday, June 1<br>GB CROWN PRINCESS<br>06:00 - 15:00<br>GB NIEUW AMSTERDAM<br>07:00 - 16:00    | Thursday, June 2<br>GB NORWEGIAN PEARL<br>06:00 - 15:00<br>GB CORAL PRINCESS<br>06:15 - 15:15    | Friday, June 3<br>GB NOORDAM<br>07:00 - 16:00<br>GB ISLAND PRINCESS<br>09:15 - 19:30    | Saturday, June 4<br>GB NORWEGIAN SUN<br>06:00 - 15:00                                            |
| Sunday, June 5<br>GB GRAND PRINCESS<br>06:00 - 15:00<br>GB VOLENDAM<br>07:00 - 16:00 | Monday, June 6<br>GB CORAL PRINCESS<br>09:15 - 19:30                                         | Tuesday, June 7<br>GB WESTERDAM<br>07:00 - 16:00<br>GB NOORDAM<br>10:00 - 19:00         | Wednesday, June 8<br>GB CROWN PRINCESS<br>06:00 - 15:00<br>GB NIEUW AMSTERDAM<br>07:00 - 16:00    | Thursday, June 9<br>GB NORWEGIAN PEARL<br>06:00 - 15:00<br>GB STAR PRINCESS<br>06:15 - 15:15     | Friday, June 10<br>GB ZAANDAM<br>07:00 - 16:00                                          | Saturday, June 11                                                                                |
| Sunday, June 12<br>GB VOLENDAM<br>07:00 - 16:00                                      | Monday, June 13<br>GB ISLAND PRINCESS<br>06:00 - 15:00<br>GB STAR PRINCESS<br>09:15 - 19:30  | Tuesday, June 14<br>GB WESTERDAM<br>07:00 - 16:00<br>GB ZAANDAM<br>10:00 - 19:00        | Wednesday, June 15<br>GB CROWN PRINCESS<br>06:00 - 15:00<br>GB NIEUW AMSTERDAM<br>07:00 - 16:00   | Thursday, June 16<br>GB NORWEGIAN PEARL<br>06:00 - 15:00<br>GB CORAL PRINCESS<br>06:15 - 15:15   | Friday, June 17<br>GB NOORDAM<br>07:00 - 16:00<br>GB ISLAND PRINCESS<br>09:15 - 19:30   | Saturday, June 18<br>GB NORWEGIAN SUN<br>06:00 - 15:00                                           |
| Sunday, June 19<br>GB VOLENDAM<br>07:00 - 16:00                                      | Monday, June 20<br>GB CORAL PRINCESS<br>09:15 - 19:30                                        | Tuesday, June 21<br>GB WESTERDAM<br>07:00 - 16:00<br>GB NOORDAM<br>10:00 - 19:00        | Wednesday, June 22<br>GB CROWN PRINCESS<br>06:00 - 15:00<br>GB NIEUW AMSTERDAM<br>07:00 - 16:00   | Thursday, June 23<br>GB NORWEGIAN PEARL<br>06:00 - 15:00<br>GB STAR PRINCESS<br>06:15 - 15:15    | Friday, June 24<br>GB ZAANDAM<br>07:00 - 16:00<br>GB CRYSTAL SERENITY<br>07:00 - 17:00  | Saturday, June 25<br>GB GRAND PRINCESS<br>06:00 - 15:00                                          |
| Sunday, June 26<br>GB VOLENDAM<br>07:00 - 16:00                                      | Monday, June 27<br>GB ISLAND PRINCESS<br>06:00 - 15:00<br>GB STAR PRINCESS<br>09:15 - 19:30  | Tuesday, June 28<br>GB WESTERDAM<br>07:00 - 16:00<br>GB ZAANDAM<br>10:00 - 19:00        | Wednesday, June 29<br>GB CROWN PRINCESS<br>06:00 - 15:00<br>GB NIEUW AMSTERDAM<br>07:00 - 16:00   | Thursday, June 30<br>GB NORWEGIAN PEARL<br>06:00 - 15:00<br>GB CORAL PRINCESS<br>06:15 - 15:15   | Friday, July 1<br>GB NOORDAM<br>07:00 - 16:00<br>GB ISLAND PRINCESS<br>09:15 - 19:30    | Saturday, July 2<br>GB NORWEGIAN SUN<br>06:00 - 15:00                                            |
| Sunday, July 3<br>GB VOLENDAM<br>07:00 - 16:00                                       | Monday, July 4<br>GB GRAND PRINCESS<br>09:15 - 19:30<br>GB CORAL PRINCESS<br>09:15 - 19:30   | Tuesday, July 5<br>GB WESTERDAM<br>07:00 - 16:00<br>GB NOORDAM<br>10:00 - 19:00         | Wednesday, July 6<br>GB CROWN PRINCESS<br>06:00 - 15:00<br>GB NIEUW AMSTERDAM<br>07:00 - 16:00    | Thursday, July 7<br>GB NORWEGIAN PEARL<br>06:00 - 15:00<br>GB STAR PRINCESS<br>06:15 - 15:15     | Friday, July 8<br>GB ZAANDAM<br>07:00 - 16:00<br>GB CRYSTAL SERENITY<br>07:00 - 17:00   | Saturday, July 9                                                                                 |
| Sunday, July 10<br>GB VOLENDAM<br>07:00 - 16:00                                      | Monday, July 11<br>GB ISLAND PRINCESS<br>06:00 - 15:00<br>GB STAR PRINCESS<br>09:15 - 19:30  | Tuesday, July 12<br>GB WESTERDAM<br>07:00 - 16:00<br>GB ZAANDAM<br>10:00 - 19:00        | Wednesday, July 13<br>GB CROWN PRINCESS<br>06:00 - 15:00<br>GB NIEUW AMSTERDAM<br>07:00 - 16:00   | Thursday, July 14<br>GB NORWEGIAN PEARL<br>06:00 - 15:00<br>GB CORAL PRINCESS<br>06:15 - 15:15   | Friday, July 15<br>GB NOORDAM<br>07:00 - 16:00<br>GB ISLAND PRINCESS<br>09:15 - 19:30   | Saturday, July 16<br>GB NORWEGIAN SUN<br>06:00 - 15:00                                           |
| Sunday, July 17<br>GB VOLENDAM<br>07:00 - 16:00                                      | Monday, July 18<br>GB CORAL PRINCESS<br>09:15 - 19:30                                        | Tuesday, July 19<br>GB NOORDAM<br>10:00 - 19:00                                         | Wednesday, July 20<br>GB CROWN PRINCESS<br>06:00 - 15:00<br>GB NIEUW AMSTERDAM<br>07:00 - 16:00   | Thursday, July 21<br>GB NORWEGIAN PEARL<br>06:00 - 15:00<br>GB STAR PRINCESS<br>06:15 - 15:15    | Friday, July 22<br>GB ZAANDAM<br>07:00 - 16:00<br>GB CRYSTAL SERENITY<br>07:00 - 18:00  | Saturday, July 23                                                                                |
| Sunday, July 24<br>GB VOLENDAM<br>07:00 - 16:00                                      | Monday, July 25<br>GB ISLAND PRINCESS<br>06:00 - 15:00<br>GB STAR PRINCESS<br>09:15 - 19:30  | Tuesday, July 26<br>GB WESTERDAM<br>07:00 - 16:00<br>GB ZAANDAM<br>10:00 - 19:00        | Wednesday, July 27<br>GB CROWN PRINCESS<br>06:00 - 15:00<br>GB NIEUW AMSTERDAM<br>07:00 - 16:00   | Thursday, July 28<br>GB NORWEGIAN PEARL<br>06:00 - 15:00<br>GB CORAL PRINCESS<br>06:15 - 15:15   | Friday, July 29<br>GB NOORDAM<br>07:00 - 16:00<br>GB ISLAND PRINCESS<br>09:15 - 19:30   | Saturday, July 30<br>GB NORWEGIAN SUN<br>06:00 - 15:00                                           |
| Sunday, July 31<br>GB VOLENDAM<br>07:00 - 16:00                                      | Monday, August 1<br>GB SUN PRINCESS<br>06:00 - 15:00<br>GB CORAL PRINCESS<br>09:15 - 19:30   | Tuesday, August 2<br>GB WESTERDAM<br>07:00 - 16:00<br>GB NOORDAM<br>10:00 - 19:00       | Wednesday, August 3<br>GB CROWN PRINCESS<br>06:00 - 15:00<br>GB NIEUW AMSTERDAM<br>07:00 - 16:00  | Thursday, August 4<br>GB NORWEGIAN PEARL<br>06:00 - 15:00<br>GB STAR PRINCESS<br>06:15 - 15:15   | Friday, August 5<br>GB ZAANDAM<br>07:00 - 16:00                                         | Saturday, August 6                                                                               |
| Sunday, August 7<br>GB VOLENDAM<br>07:00 - 16:00                                     | Monday, August 8<br>GB ISLAND PRINCESS<br>06:00 - 15:00<br>GB STAR PRINCESS<br>09:15 - 19:30 | Tuesday, August 9<br>GB WESTERDAM<br>07:00 - 16:00<br>GB ZAANDAM<br>10:00 - 19:00       | Wednesday, August 10<br>GB CROWN PRINCESS<br>06:00 - 15:00<br>GB NIEUW AMSTERDAM<br>07:00 - 16:00 | Thursday, August 11<br>GB NORWEGIAN PEARL<br>06:00 - 15:00<br>GB CORAL PRINCESS<br>06:15 - 15:15 | Friday, August 12<br>GB NOORDAM<br>07:00 - 16:00<br>GB ISLAND PRINCESS<br>09:15 - 19:30 | Saturday, August 13<br>GB NORWEGIAN SUN<br>06:00 - 15:00<br>GB CRYSTAL SERENITY<br>08:00 - 17:00 |

**Supplemental Figure 7.** Cruise ship schedule for 2016, continued

|                                                                                         |                                                                                                  |                                                                                       |                                                                                                      |                                                                                                    |                                                                                                  |                                                                                                    |
|-----------------------------------------------------------------------------------------|--------------------------------------------------------------------------------------------------|---------------------------------------------------------------------------------------|------------------------------------------------------------------------------------------------------|----------------------------------------------------------------------------------------------------|--------------------------------------------------------------------------------------------------|----------------------------------------------------------------------------------------------------|
| Sunday, August 14<br>GB GRAND PRINCESS<br>06:00 - 15:00<br>GB VOLENDAM<br>07:00 - 16:00 | Monday, August 15<br>GB CORAL PRINCESS<br>09:15 - 19:30                                          | Tuesday, August 16<br>GB WESTERDAM<br>07:00 - 16:00<br>GB NOORDAM<br>10:00 - 19:00    | Wednesday, August 17<br>GB CROWN PRINCESS<br>06:00 - 15:00<br>GB NIEUW AMSTERDAM<br>07:00 - 16:00    | Thursday, August 18<br>GB NORWEGIAN PEARL<br>06:00 - 15:00<br>GB STAR PRINCESS<br>06:15 - 15:15    | Friday, August 19<br>GB ZAANDAM<br>07:00 - 16:00                                                 | Saturday, August 20                                                                                |
| Sunday, August 21<br>GB VOLENDAM<br>07:00 - 16:00                                       | Monday, August 22<br>GB ISLAND PRINCESS<br>06:00 - 15:00<br>GB STAR PRINCESS<br>09:15 - 19:30    | Tuesday, August 23<br>GB WESTERDAM<br>07:00 - 16:00<br>GB ZAANDAM<br>10:00 - 19:00    | Wednesday, August 24<br>GB CROWN PRINCESS<br>06:00 - 15:00<br>GB NIEUW AMSTERDAM<br>07:00 - 16:00    | Thursday, August 25<br>GB NORWEGIAN PEARL<br>06:00 - 15:00<br>GB CORAL PRINCESS<br>06:15 - 15:15   | Friday, August 26<br>GB NOORDAM<br>07:00 - 16:00<br>GB ISLAND PRINCESS<br>09:15 - 19:30          | Saturday, August 27<br>GB NORWEGIAN SUN<br>06:00 - 15:00                                           |
| Sunday, August 28<br>GB VOLENDAM<br>07:00 - 16:00                                       | Monday, August 29<br>GB CORAL PRINCESS<br>09:15 - 19:30                                          | Tuesday, August 30<br>GB WESTERDAM<br>07:00 - 16:00<br>GB NOORDAM<br>10:00 - 19:00    | Wednesday, August 31<br>GB CROWN PRINCESS<br>06:00 - 15:00<br>GB NIEUW AMSTERDAM<br>07:00 - 16:00    | Thursday, September 1<br>GB NORWEGIAN PEARL<br>06:00 - 15:00<br>GB STAR PRINCESS<br>06:15 - 15:15  | Friday, September 2<br>GB ZAANDAM<br>07:00 - 16:00                                               | Saturday, September 3<br>GB GRAND PRINCESS<br>06:00 - 15:00                                        |
| Sunday, September 4<br>GB VOLENDAM<br>07:00 - 16:00                                     | Monday, September 5<br>GB ISLAND PRINCESS<br>06:00 - 15:00<br>GB STAR PRINCESS<br>09:15 - 19:30  | Tuesday, September 6<br>GB WESTERDAM<br>07:00 - 16:00<br>GB ZAANDAM<br>10:00 - 19:00  | Wednesday, September 7<br>GB CROWN PRINCESS<br>06:00 - 15:00<br>GB NIEUW AMSTERDAM<br>07:00 - 16:00  | Thursday, September 8<br>GB NORWEGIAN PEARL<br>06:00 - 15:00<br>GB CORAL PRINCESS<br>06:15 - 15:15 | Friday, September 9<br>GB NOORDAM<br>07:00 - 16:00<br>GB ISLAND PRINCESS<br>09:15 - 19:30        | Saturday, September 10<br>GB NORWEGIAN SUN<br>06:00 - 15:00<br>GB CARNIVAL LEGEND<br>07:00 - 16:00 |
| Sunday, September 11<br>GB VOLENDAM<br>07:00 - 16:00                                    | Monday, September 12<br>GB GRAND PRINCESS<br>09:15 - 19:30<br>GB CORAL PRINCESS<br>09:15 - 19:30 | Tuesday, September 13<br>GB WESTERDAM<br>07:00 - 16:00<br>GB NOORDAM<br>10:00 - 19:00 | Wednesday, September 14<br>GB CROWN PRINCESS<br>06:00 - 15:00<br>GB NIEUW AMSTERDAM<br>07:00 - 16:00 | Thursday, September 15<br>GB NORWEGIAN PEARL<br>06:00 - 15:00<br>GB STAR PRINCESS<br>06:15 - 15:15 | Friday, September 16<br>GB ZAANDAM<br>07:00 - 16:00                                              | Saturday, September 17                                                                             |
| Sunday, September 18<br>GB VOLENDAM<br>07:00 - 16:00                                    | Monday, September 19<br>GB STAR PRINCESS<br>09:15 - 19:30                                        | Tuesday, September 20<br>GB WESTERDAM<br>07:00 - 16:00<br>GB ZAANDAM<br>10:00 - 19:00 | Wednesday, September 21<br>GB NIEUW AMSTERDAM<br>07:00 - 16:00                                       | Thursday, September 22<br>GB NORWEGIAN PEARL<br>06:00 - 15:00<br>GB NOORDAM<br>07:00 - 16:00       | Friday, September 23<br>GB NORWEGIAN SUN<br>06:00 - 15:00<br>GB NORWEGIAN JEWEL<br>07:00 - 16:00 | Saturday, September 24                                                                             |
| Sunday, September 25<br>GB VOLENDAM<br>07:00 - 16:00                                    | Monday, September 26                                                                             | Tuesday, September 27<br>GB WESTERDAM<br>07:00 - 16:00                                | Wednesday, September 28<br>GB NIEUW AMSTERDAM<br>07:00 - 16:00                                       | Thursday, September 29                                                                             | Friday, September 30                                                                             | Saturday, October 1                                                                                |
| Sunday, October 2<br>GB VOLENDAM<br>07:00 - 16:00                                       | Monday, October 3                                                                                | Tuesday, October 4                                                                    | Wednesday, October 5                                                                                 | Thursday, October 6                                                                                | Friday, October 7                                                                                | Saturday, October 8                                                                                |

## Supplemental Figure 8. Cruise ship schedule for 2018

|                                                                                       |                                                                                               |                                                                                    |                                                                                                  |                                                                                                   |                                                                                          |                                                                                                |
|---------------------------------------------------------------------------------------|-----------------------------------------------------------------------------------------------|------------------------------------------------------------------------------------|--------------------------------------------------------------------------------------------------|---------------------------------------------------------------------------------------------------|------------------------------------------------------------------------------------------|------------------------------------------------------------------------------------------------|
| Sunday, April 29                                                                      | Monday, April 30                                                                              | Tuesday, May 1                                                                     | Wednesday, May 2<br>GB RUBY PRINCESS<br>06:00 - 15:00                                            | Thursday, May 3<br>GB NORWEGIAN PEARL<br>06:00 - 15:00<br>GB WESTERDAM<br>07:00 - 16:00           | Friday, May 4<br>GB EMERALD PRINCESS<br>06:00 - 15:00                                    | Saturday, May 5                                                                                |
| Sunday, May 6<br>GB ISLAND PRINCESS<br>06:00 - 15:00<br>GB VOLENDAM<br>07:00 - 16:00  | Monday, May 7<br>GB STAR PRINCESS<br>11:00 - 20:00                                            | Tuesday, May 8                                                                     | Wednesday, May 9<br>GB RUBY PRINCESS<br>06:00 - 15:00<br>GB NIEUW AMSTERDAM<br>07:00 - 16:00     | Thursday, May 10<br>GB NORWEGIAN PEARL<br>06:00 - 15:00<br>GB WESTERDAM<br>07:00 - 16:00          | Friday, May 11<br>GB GRAND PRINCESS<br>06:00 - 15:00                                     | Saturday, May 12                                                                               |
| Sunday, May 13<br>GB ISLAND PRINCESS<br>06:00 - 15:00<br>GB VOLENDAM<br>07:00 - 16:00 | Monday, May 14<br>GB CORAL PRINCESS<br>06:00 - 15:00<br>GB GOLDEN PRINCESS<br>09:15 - 19:30   | Tuesday, May 15<br>GB EURODAM<br>07:00 - 16:00<br>GB NOORDAM<br>08:00 - 17:00      | Wednesday, May 16<br>GB RUBY PRINCESS<br>06:00 - 15:00<br>GB NIEUW AMSTERDAM<br>07:00 - 16:00    | Thursday, May 17<br>GB STAR PRINCESS<br>06:00 - 15:00<br>GB NORWEGIAN PEARL<br>06:00 - 15:00      | Friday, May 18<br>GB WESTERDAM<br>07:00 - 17:00<br>GB CORAL PRINCESS<br>09:15 - 19:30    | Saturday, May 19<br>GB CARNIVAL LEGEND<br>06:00 - 15:00                                        |
| Sunday, May 20<br>GB NORWEGIAN JEWEL<br>06:00 - 15:00<br>GB VOLENDAM<br>07:00 - 16:00 | Monday, May 21<br>GB ISLAND PRINCESS<br>06:00 - 15:00<br>GB STAR PRINCESS<br>09:15 - 19:30    | Tuesday, May 22<br>GB EURODAM<br>07:00 - 16:00<br>GB WESTERDAM<br>10:00 - 19:00    | Wednesday, May 23<br>GB RUBY PRINCESS<br>06:00 - 15:00<br>GB NIEUW AMSTERDAM<br>07:00 - 16:00    | Thursday, May 24<br>GB GOLDEN PRINCESS<br>06:00 - 15:00<br>GB NORWEGIAN PEARL<br>06:00 - 15:00    | Friday, May 25<br>GB NOORDAM<br>07:00 - 17:00<br>GB ISLAND PRINCESS<br>09:15 - 19:30     | Saturday, May 26<br>GB CARNIVAL LEGEND<br>06:00 - 15:00                                        |
| Sunday, May 27<br>GB VOLENDAM<br>07:00 - 16:00                                        | Monday, May 28<br>GB CORAL PRINCESS<br>06:00 - 15:00<br>GB GOLDEN PRINCESS<br>09:15 - 19:30   | Tuesday, May 29<br>GB EURODAM<br>07:00 - 16:00<br>GB NOORDAM<br>10:00 - 19:00      | Wednesday, May 30<br>GB RUBY PRINCESS<br>06:00 - 15:00<br>GB NIEUW AMSTERDAM<br>07:00 - 16:00    | Thursday, May 31<br>GB STAR PRINCESS<br>06:00 - 15:00<br>GB NORWEGIAN PEARL<br>06:00 - 15:00      | Friday, June 1<br>GB WESTERDAM<br>07:00 - 17:00<br>GB CORAL PRINCESS<br>09:15 - 19:30    | Saturday, June 2                                                                               |
| Sunday, June 3<br>GB VOLENDAM<br>07:00 - 16:00                                        | Monday, June 4<br>GB ISLAND PRINCESS<br>06:00 - 15:00<br>GB STAR PRINCESS<br>09:15 - 19:30    | Tuesday, June 5<br>GB EURODAM<br>07:00 - 16:00<br>GB WESTERDAM<br>10:00 - 19:00    | Wednesday, June 6<br>GB RUBY PRINCESS<br>06:00 - 15:00<br>GB NIEUW AMSTERDAM<br>07:00 - 16:00    | Thursday, June 7<br>GB GOLDEN PRINCESS<br>06:00 - 15:00<br>GB NORWEGIAN PEARL<br>06:00 - 15:00    | Friday, June 8<br>GB NOORDAM<br>07:00 - 17:00<br>GB ISLAND PRINCESS<br>09:15 - 19:30     | Saturday, June 9                                                                               |
| Sunday, June 10<br>GB VOLENDAM<br>07:00 - 16:00                                       | Monday, June 11<br>GB CORAL PRINCESS<br>06:00 - 15:00<br>GB GOLDEN PRINCESS<br>09:15 - 19:30  | Tuesday, June 12<br>GB EURODAM<br>07:00 - 16:00<br>GB NOORDAM<br>10:00 - 19:00     | Wednesday, June 13<br>GB RUBY PRINCESS<br>06:00 - 15:00<br>GB NIEUW AMSTERDAM<br>07:00 - 16:00   | Thursday, June 14<br>GB STAR PRINCESS<br>06:00 - 15:00<br>GB NORWEGIAN PEARL<br>06:00 - 15:00     | Friday, June 15<br>GB WESTERDAM<br>07:00 - 17:00<br>GB CORAL PRINCESS<br>09:15 - 19:30   | Saturday, June 16<br>GB NORWEGIAN JEWEL<br>06:00 - 15:00                                       |
| Sunday, June 17<br>GB VOLENDAM<br>07:00 - 16:00                                       | Monday, June 18<br>GB ISLAND PRINCESS<br>06:00 - 15:00<br>GB STAR PRINCESS<br>09:15 - 19:30   | Tuesday, June 19<br>GB EURODAM<br>07:00 - 16:00<br>GB WESTERDAM<br>10:00 - 19:00   | Wednesday, June 20<br>GB RUBY PRINCESS<br>06:00 - 15:00<br>GB NIEUW AMSTERDAM<br>07:00 - 16:00   | Thursday, June 21<br>GB GOLDEN PRINCESS<br>06:00 - 15:00<br>GB NORWEGIAN PEARL<br>06:00 - 15:00   | Friday, June 22<br>GB NOORDAM<br>07:00 - 17:00<br>GB ISLAND PRINCESS<br>09:15 - 19:30    | Saturday, June 23                                                                              |
| Sunday, June 24<br>GB VOLENDAM<br>07:00 - 16:00                                       | Monday, June 25<br>GB CORAL PRINCESS<br>06:00 - 15:00<br>GB GOLDEN PRINCESS<br>09:15 - 19:30  | Tuesday, June 26<br>GB EURODAM<br>07:00 - 16:00<br>GB NOORDAM<br>10:00 - 19:00     | Wednesday, June 27<br>GB RUBY PRINCESS<br>06:00 - 15:00<br>GB NIEUW AMSTERDAM<br>07:00 - 16:00   | Thursday, June 28<br>GB STAR PRINCESS<br>06:00 - 15:00<br>GB NORWEGIAN PEARL<br>06:00 - 15:00     | Friday, June 29<br>GB WESTERDAM<br>07:00 - 17:00<br>GB CORAL PRINCESS<br>09:15 - 19:30   | Saturday, June 30<br>GB GRAND PRINCESS<br>06:00 - 15:00<br>GB NORWEGIAN JEWEL<br>06:00 - 15:00 |
| Sunday, July 1<br>GB VOLENDAM<br>07:00 - 16:00                                        | Monday, July 2<br>GB ISLAND PRINCESS<br>06:00 - 15:00<br>GB STAR PRINCESS<br>09:15 - 19:30    | Tuesday, July 3<br>GB EURODAM<br>07:00 - 16:00<br>GB WESTERDAM<br>10:00 - 19:00    | Wednesday, July 4<br>GB RUBY PRINCESS<br>06:00 - 15:00<br>GB NIEUW AMSTERDAM<br>07:00 - 16:00    | Thursday, July 5<br>GB GOLDEN PRINCESS<br>06:00 - 15:00<br>GB NORWEGIAN PEARL<br>06:00 - 15:00    | Friday, July 6<br>GB NOORDAM<br>07:00 - 17:00<br>GB ISLAND PRINCESS<br>09:15 - 19:30     | Saturday, July 7                                                                               |
| Sunday, July 8<br>GB VOLENDAM<br>07:00 - 16:00                                        | Monday, July 9<br>GB CORAL PRINCESS<br>06:00 - 15:00<br>GB GOLDEN PRINCESS<br>09:15 - 19:30   | Tuesday, July 10<br>GB NOORDAM<br>10:00 - 19:00                                    | Wednesday, July 11<br>GB RUBY PRINCESS<br>06:00 - 15:00<br>GB NIEUW AMSTERDAM<br>07:00 - 16:00   | Thursday, July 12<br>GB STAR PRINCESS<br>06:00 - 15:00<br>GB NORWEGIAN PEARL<br>06:00 - 15:00     | Friday, July 13<br>GB WESTERDAM<br>07:00 - 17:00<br>GB CORAL PRINCESS<br>09:15 - 19:30   | Saturday, July 14<br>GB NORWEGIAN JEWEL<br>06:00 - 15:00                                       |
| Sunday, July 15<br>GB VOLENDAM<br>07:00 - 16:00                                       | Monday, July 16<br>GB ISLAND PRINCESS<br>06:00 - 15:00<br>GB STAR PRINCESS<br>09:15 - 19:30   | Tuesday, July 17<br>GB EURODAM<br>07:00 - 16:00<br>GB WESTERDAM<br>10:00 - 19:00   | Wednesday, July 18<br>GB RUBY PRINCESS<br>06:00 - 15:00<br>GB NIEUW AMSTERDAM<br>07:00 - 16:00   | Thursday, July 19<br>GB GOLDEN PRINCESS<br>06:00 - 15:00<br>GB NORWEGIAN PEARL<br>06:00 - 15:00   | Friday, July 20<br>GB NOORDAM<br>07:00 - 17:00<br>GB ISLAND PRINCESS<br>09:15 - 19:30    | Saturday, July 21                                                                              |
| Sunday, July 22<br>GB VOLENDAM<br>07:00 - 16:00                                       | Monday, July 23<br>GB CORAL PRINCESS<br>06:00 - 15:00<br>GB GOLDEN PRINCESS<br>09:15 - 19:30  | Tuesday, July 24<br>GB EURODAM<br>07:00 - 16:00<br>GB NOORDAM<br>10:00 - 19:00     | Wednesday, July 25<br>GB RUBY PRINCESS<br>06:00 - 15:00<br>GB NIEUW AMSTERDAM<br>07:00 - 16:00   | Thursday, July 26<br>GB STAR PRINCESS<br>06:00 - 15:00<br>GB NORWEGIAN PEARL<br>06:00 - 15:00     | Friday, July 27<br>GB WESTERDAM<br>07:00 - 17:00<br>GB CORAL PRINCESS<br>09:15 - 19:30   | Saturday, July 28<br>GB NORWEGIAN JEWEL<br>06:00 - 15:00                                       |
| Sunday, July 29<br>GB VOLENDAM<br>07:00 - 16:00                                       | Monday, July 30<br>GB ISLAND PRINCESS<br>06:00 - 15:00<br>GB STAR PRINCESS<br>09:15 - 19:30   | Tuesday, July 31<br>GB EURODAM<br>07:00 - 16:00<br>GB WESTERDAM<br>10:00 - 19:00   | Wednesday, August 1<br>GB RUBY PRINCESS<br>06:00 - 15:00<br>GB NIEUW AMSTERDAM<br>07:00 - 16:00  | Thursday, August 2<br>GB GOLDEN PRINCESS<br>06:00 - 15:00<br>GB NORWEGIAN PEARL<br>06:00 - 15:00  | Friday, August 3<br>GB NOORDAM<br>07:00 - 17:00<br>GB ISLAND PRINCESS<br>09:15 - 19:30   | Saturday, August 4                                                                             |
| Sunday, August 5<br>GB VOLENDAM<br>07:00 - 16:00                                      | Monday, August 6<br>GB CORAL PRINCESS<br>06:00 - 15:00<br>GB GOLDEN PRINCESS<br>09:15 - 19:30 | Tuesday, August 7<br>GB EURODAM<br>07:00 - 16:00<br>GB NOORDAM<br>10:00 - 19:00    | Wednesday, August 8<br>GB RUBY PRINCESS<br>06:00 - 15:00<br>GB NIEUW AMSTERDAM<br>07:00 - 16:00  | Thursday, August 9<br>GB STAR PRINCESS<br>06:00 - 15:00<br>GB NORWEGIAN PEARL<br>06:00 - 15:00    | Friday, August 10<br>GB WESTERDAM<br>07:00 - 17:00<br>GB CORAL PRINCESS<br>09:15 - 19:30 | Saturday, August 11<br>GB NORWEGIAN JEWEL<br>06:00 - 15:00                                     |
| Sunday, August 12<br>GB VOLENDAM<br>07:00 - 16:00                                     | Monday, August 13<br>GB ISLAND PRINCESS<br>06:00 - 15:00<br>GB STAR PRINCESS<br>09:15 - 19:30 | Tuesday, August 14<br>GB EURODAM<br>07:00 - 16:00<br>GB WESTERDAM<br>10:00 - 19:00 | Wednesday, August 15<br>GB RUBY PRINCESS<br>06:00 - 15:00<br>GB NIEUW AMSTERDAM<br>07:00 - 16:00 | Thursday, August 16<br>GB GOLDEN PRINCESS<br>06:00 - 15:00<br>GB NORWEGIAN PEARL<br>06:00 - 15:00 | Friday, August 17<br>GB NOORDAM<br>07:00 - 17:00<br>GB ISLAND PRINCESS<br>09:15 - 19:30  | Saturday, August 18                                                                            |

**Supplemental Figure 8. Cruise ship schedule for 2018, continued**

|                                                                                             |                                                                                                  |                                                                                            |                                                                                                     |                                                                                                   |                                                                                            |                                                                                                       |
|---------------------------------------------------------------------------------------------|--------------------------------------------------------------------------------------------------|--------------------------------------------------------------------------------------------|-----------------------------------------------------------------------------------------------------|---------------------------------------------------------------------------------------------------|--------------------------------------------------------------------------------------------|-------------------------------------------------------------------------------------------------------|
| Sunday, August 19<br>GB GRAND PRINCESS<br>06:00 - 15:00<br>GB VOLENDAM<br>07:00 - 16:00     | Monday, August 20<br>GB CORAL PRINCESS<br>06:00 - 15:00<br>GB GOLDEN PRINCESS<br>09:15 - 19:30   | Tuesday, August 21<br>GB EURODAM<br>07:00 - 16:00<br>GB NOORDAM<br>10:00 - 19:00           | Wednesday, August 22<br>GB RUBY PRINCESS<br>06:00 - 15:00<br>GB NIEUW AMSTERDAM<br>07:00 - 16:00    | Thursday, August 23<br>GB STAR PRINCESS<br>06:00 - 15:00<br>GB NORWEGIAN PEARL<br>06:00 - 15:00   | Friday, August 24<br>GB WESTERDAM<br>07:00 - 17:00<br>GB CORAL PRINCESS<br>09:15 - 19:30   | Saturday, August 25<br>GB NORWEGIAN JEWEL<br>06:00 - 15:00                                            |
| Sunday, August 26<br>GB VOLENDAM<br>07:00 - 16:00                                           | Monday, August 27<br>GB ISLAND PRINCESS<br>06:00 - 15:00<br>GB STAR PRINCESS<br>09:15 - 19:30    | Tuesday, August 28<br>GB EURODAM<br>07:00 - 16:00<br>GB WESTERDAM<br>10:00 - 19:00         | Wednesday, August 29<br>GB RUBY PRINCESS<br>06:00 - 15:00<br>GB NIEUW AMSTERDAM<br>07:00 - 16:00    | Thursday, August 30<br>GB GOLDEN PRINCESS<br>06:00 - 15:00<br>GB NORWEGIAN PEARL<br>06:00 - 15:00 | Friday, August 31<br>GB NOORDAM<br>07:00 - 17:00<br>GB ISLAND PRINCESS<br>09:15 - 19:30    | Saturday, September 1<br>GB CARNIVAL SPLENDOR<br>07:00 - 16:00<br>GB CARNIVAL LEGEND<br>07:00 - 16:00 |
| Sunday, September 2<br>GB VOLENDAM<br>07:00 - 16:00                                         | Monday, September 3<br>GB CORAL PRINCESS<br>06:00 - 15:00<br>GB GOLDEN PRINCESS<br>09:15 - 19:30 | Tuesday, September 4<br>GB EURODAM<br>07:00 - 16:00<br>GB NOORDAM<br>10:00 - 19:00         | Wednesday, September 5<br>GB RUBY PRINCESS<br>06:00 - 15:00<br>GB NIEUW AMSTERDAM<br>07:00 - 16:00  | Thursday, September 6<br>GB STAR PRINCESS<br>06:00 - 15:00<br>GB NORWEGIAN PEARL<br>06:00 - 15:00 | Friday, September 7<br>GB WESTERDAM<br>07:00 - 17:00<br>GB CORAL PRINCESS<br>09:15 - 19:30 | Saturday, September 8<br>GB NORWEGIAN JEWEL<br>06:00 - 15:00<br>GB GRAND PRINCESS<br>07:00 - 16:00    |
| Sunday, September 9<br>GB VOLENDAM<br>07:00 - 16:00<br>GB CARNIVAL LEGEND<br>07:00 - 16:00  | Monday, September 10<br>GB ISLAND PRINCESS<br>06:00 - 15:00<br>GB STAR PRINCESS<br>09:15 - 19:30 | Tuesday, September 11<br>GB EURODAM<br>07:00 - 16:00<br>GB WESTERDAM<br>10:00 - 19:00      | Wednesday, September 12<br>GB RUBY PRINCESS<br>06:00 - 15:00<br>GB NIEUW AMSTERDAM<br>07:00 - 16:00 | Thursday, September 13<br>GB NORWEGIAN PEARL<br>06:00 - 15:00                                     | Friday, September 14<br>GB NOORDAM<br>07:00 - 17:00<br>GB ISLAND PRINCESS<br>09:15 - 19:30 | Saturday, September 15                                                                                |
| Sunday, September 16<br>GB VOLENDAM<br>07:00 - 16:00<br>GB GOLDEN PRINCESS<br>10:00 - 19:00 | Monday, September 17<br>GB GRAND PRINCESS<br>07:00 - 16:00                                       | Tuesday, September 18<br>GB EURODAM<br>07:00 - 16:00<br>GB NOORDAM<br>10:00 - 19:00        | Wednesday, September 19<br>GB RUBY PRINCESS<br>06:00 - 15:00<br>GB NIEUW AMSTERDAM<br>07:00 - 16:00 | Thursday, September 20<br>GB NORWEGIAN PEARL<br>06:00 - 15:00<br>GB WESTERDAM<br>07:00 - 16:00    | Friday, September 21                                                                       | Saturday, September 22                                                                                |
| Sunday, September 23<br>GB VOLENDAM<br>07:00 - 16:00                                        | Monday, September 24                                                                             | Tuesday, September 25<br>GB CORAL PRINCESS<br>07:00 - 16:00<br>GB EURODAM<br>07:00 - 16:00 | Wednesday, September 26<br>GB STAR PRINCESS<br>07:00 - 16:00<br>GB NIEUW AMSTERDAM<br>07:00 - 16:00 | Thursday, September 27<br>GB NORWEGIAN PEARL<br>06:00 - 15:00<br>GB NOORDAM<br>07:00 - 16:00      | Friday, September 28                                                                       | Saturday, September 29                                                                                |
| Sunday, September 30                                                                        | Monday, October 1                                                                                | Tuesday, October 2                                                                         | Wednesday, October 3<br>GB WESTERDAM<br>07:00 - 16:00                                               | Thursday, October 4                                                                               | Friday, October 5                                                                          | Saturday, October 6                                                                                   |
